# Supplementary material for: Ultra-small Fe3O4 nanoparticle decorated graphene nanosheets with superior cyclic performance and rate capability
Source: Royal Society of Chemistry journal article supplement (doi:10.1039/c3nr01826a), 2013-01-01
Supplement: c3nr01826a.pdf [file c3nr01826a.pdf]

## Supporting Information

for

### Ultra-small Fe<sub>3</sub>O<sub>4</sub> nanoparticles decorated graphenes with superior cyclic performance and rate capability

By Yu Chen<sup>#</sup>, Bohang Song<sup>&</sup>, Li Lu<sup>&</sup>, and Junmin Xue<sup>#\*</sup>

<sup>#</sup>Department of Materials Science and Engineering, <sup>&</sup>Department of Mechanical Engineering, National University of Singapore, Singapore, 117576

\*Corresponding author: msexuejm@nus.edu.sg

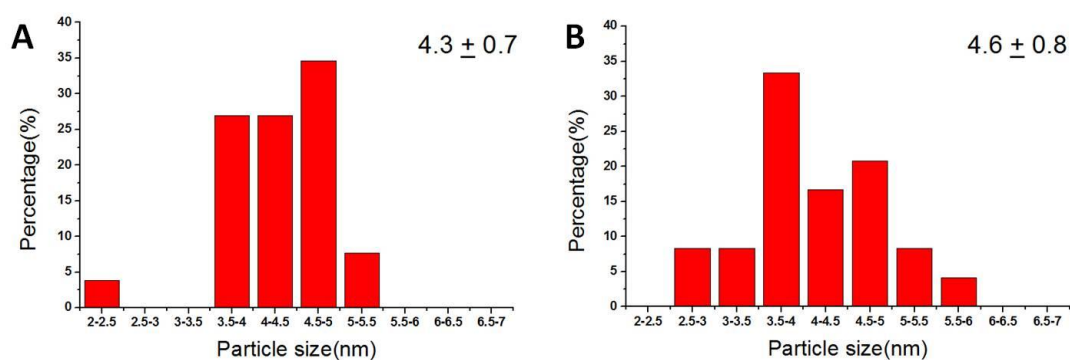

Figure S1. Size distribution of Fe<sub>3</sub>O<sub>4</sub> particles (A) before and (B) after annealing.

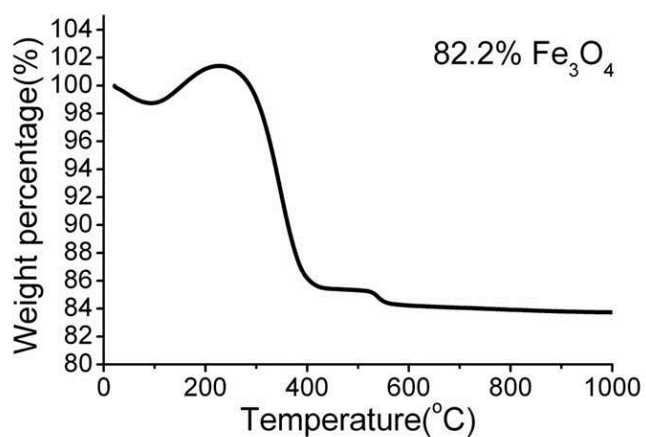

Figure S2. Thermogravimetric curve of the annealed USIO/G composite.

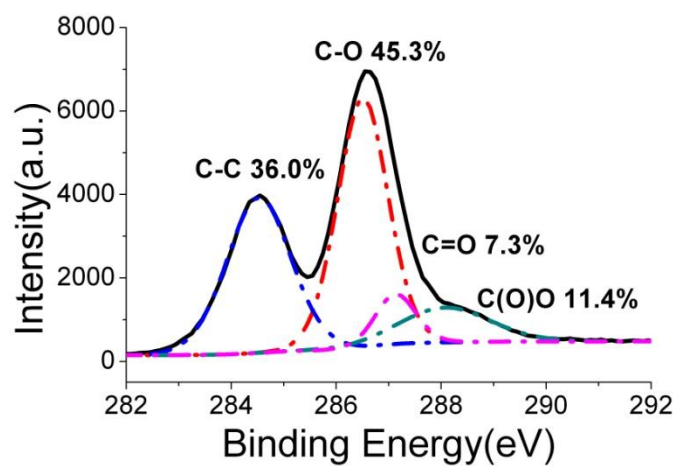

Figure S3. High resolution XPS spectrum of Fe2p from USIO/G.

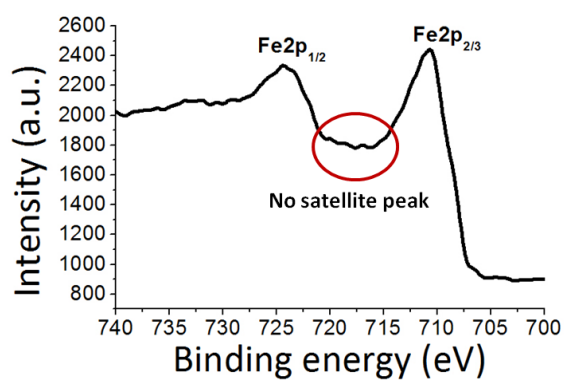

Figure S4. Cyclic voltammogram of USIO/G at 1800 mA g<sup>-1</sup>.

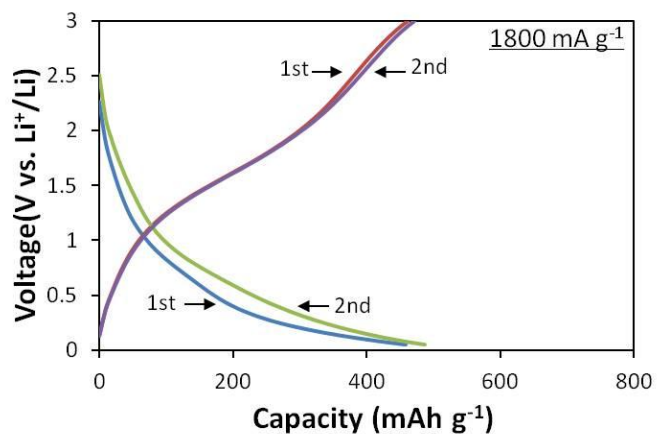

Figure S5. Charge-discharge profiles of the annealed USIO/G composites at first two cycles after current density restored to  $1800 \text{ mA g}^{-1}$  (corresponding to total cycle numbers of 921<sup>st</sup> and 922<sup>nd</sup>).

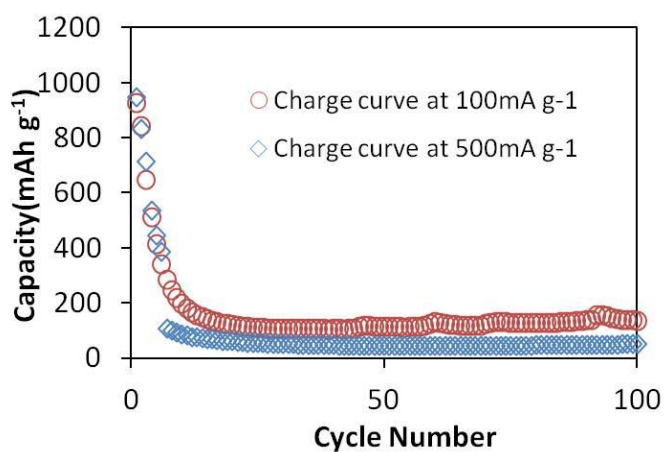

Figure S6. Cycling performance of pure ultra-small iron oxide (USIO) under different current densities. Red circle: 100 cycle under current density of  $100 \text{ mA g}^{-1}$ . Blue diamond: first 3 cycles at  $50 \text{ mA g}^{-1}$ , subsequent 3 cycles at  $100 \text{ mA g}^{-1}$ , followed by 94 cycles at  $500 \text{ mA g}^{-1}$ .
